# Supplementary material
Source: PubMed Central journal article supplement (PMC5278681)
Supplement: AAC.01516-16_zac002175923s1.pdf [file AAC.01516-16_zac002175923s1.pdf]

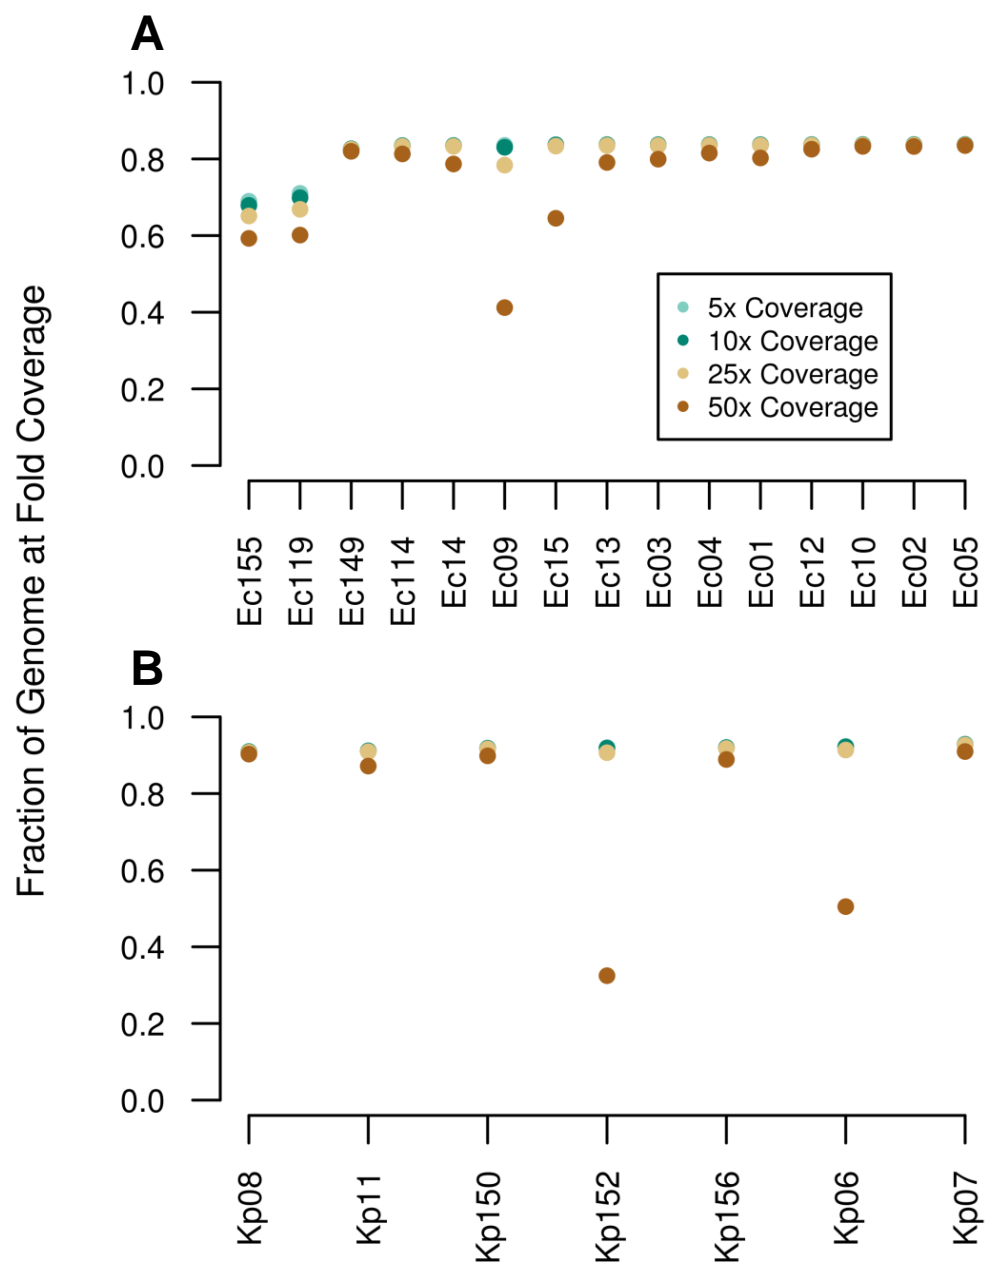

**Figure S1.** Short-read coverage against against NCTC9394 (RefSeq: NC\_021046.1) for *E. cloacae* strains (A) or MGH78578 (GenBank: CP000647.1) for *K. pneumoniae* strains (B).

**A**

| Strain ID | Organism             | KPC   | Tn4401 | Plasmid Finder | % coverage of a reference plasmid (NZ_CP008826) | 233 plasmid (10192bp) NG_041614.1 | pKPC_CAV1392 (43621bp) NZ_CP011575.1 | p34399 (43500bp) NZ_CP010387.1 | pKPC-f91 (47290bp) NZ_CP008826.1 | pRYCKPC3.1 (9803bp) NC_019151.1 |
|-----------|----------------------|-------|--------|----------------|-------------------------------------------------|-----------------------------------|--------------------------------------|--------------------------------|----------------------------------|---------------------------------|
| Ec01      | <i>E. cloacae</i>    | KPC-3 | b      | repA           | 92                                              |                                   |                                      |                                |                                  |                                 |
| Ec02      | <i>E. cloacae</i>    | KPC-3 | b      | repA           | 92                                              |                                   |                                      |                                |                                  |                                 |
| Ec03      | <i>E. cloacae</i>    | KPC-3 | b      | repA           | 92                                              |                                   |                                      |                                |                                  |                                 |
| Ec04      | <i>E. cloacae</i>    | KPC-3 | b      | repA           | 92                                              |                                   |                                      |                                |                                  |                                 |
| Ec05      | <i>E. cloacae</i>    | KPC-3 | b      | repA           | 93                                              |                                   |                                      |                                |                                  |                                 |
| Kp06      | <i>K. pneumoniae</i> | KPC-3 | d      | IncFIA(HI1)    | 32                                              |                                   |                                      |                                |                                  |                                 |
| Kp07      | <i>K. pneumoniae</i> | KPC-3 | b      | repA           | 92                                              |                                   |                                      |                                |                                  |                                 |
| Kp08      | <i>K. pneumoniae</i> | KPC-3 | b      | IncI2          | 32                                              |                                   |                                      |                                |                                  |                                 |
| Ec09      | <i>E. cloacae</i>    | KPC-3 | b      | repA           | 89                                              |                                   |                                      |                                |                                  |                                 |
| Ec10      | <i>E. cloacae</i>    | KPC-3 | b      | repA           | 92                                              |                                   |                                      |                                |                                  |                                 |
| Kp11      | <i>K. pneumoniae</i> | KPC-3 | b      | repA           | 92                                              |                                   |                                      |                                |                                  |                                 |
| Ec12      | <i>E. cloacae</i>    | KPC-3 | b      | repA           | 92                                              |                                   |                                      |                                |                                  |                                 |
| Ec13      | <i>E. cloacae</i>    | KPC-3 | b      | repA           | 92                                              |                                   |                                      |                                |                                  |                                 |
| Ec14      | <i>E. cloacae</i>    | KPC-3 | b      | repA           | 92                                              |                                   |                                      |                                |                                  |                                 |
| Ec15      | <i>E. cloacae</i>    | KPC-3 | b      | repA           | 92                                              |                                   |                                      |                                |                                  |                                 |
| Ec114     | <i>E. cloacae</i>    | KPC-3 | b      | repA           | 92                                              |                                   |                                      |                                |                                  |                                 |
| Ec149     | <i>E. cloacae</i>    | KPC-3 | b      | repA           | 94                                              |                                   |                                      |                                |                                  |                                 |
| Kp150     | <i>K. pneumoniae</i> | KPC-2 | a      | IncFII(K)      | 39                                              |                                   |                                      |                                |                                  |                                 |
| Kp152     | <i>K. pneumoniae</i> | KPC-3 | d      | N/A            | 39                                              |                                   |                                      |                                |                                  |                                 |
| Kp156     | <i>K. pneumoniae</i> | KPC-3 | d      | N/A            | 39                                              |                                   |                                      |                                |                                  |                                 |

**B**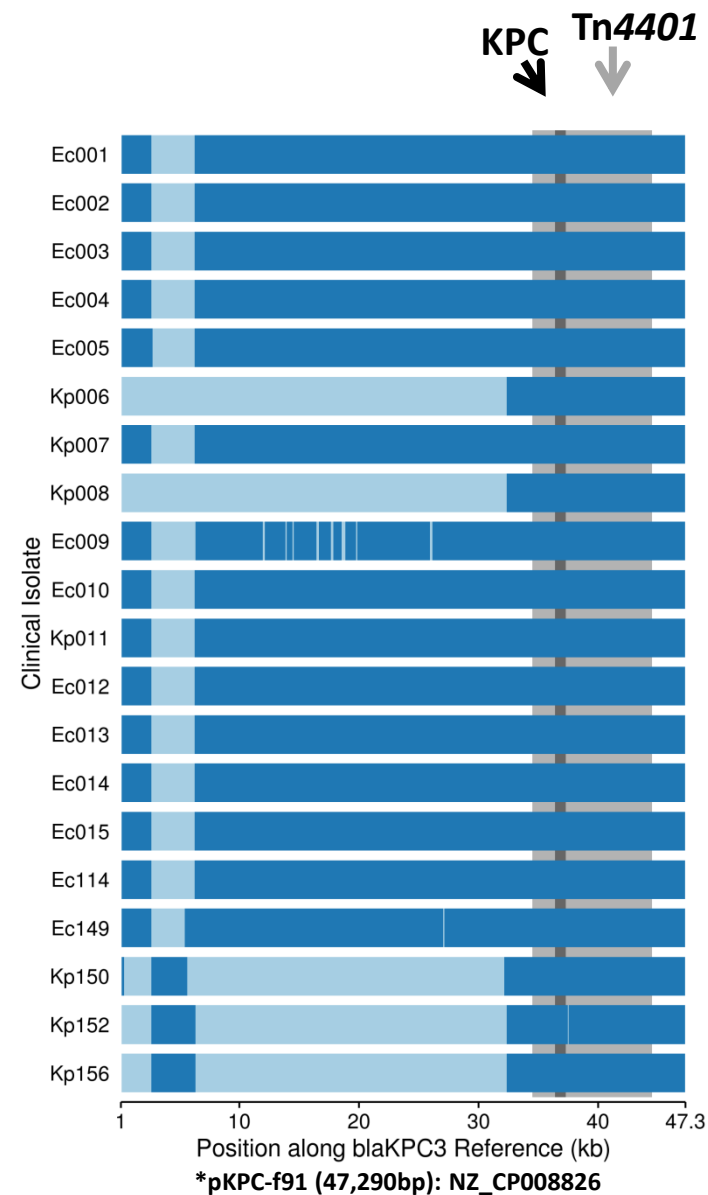

**Figure S2.** (A) Association of *bla*<sub>KPC</sub>-containing contigs from *de novo* assemblies with publicly available plasmids on Blastn search. Presence (black) / absence (white) of plasmid references (RefSeq) for each isolate is shown. (B) The most common *bla*<sub>KPC-3</sub>-containing *de novo* assembled contig/plasmid had high sequence homology with three previously described plasmids. For quality control purposes, short reads from all *bla*<sub>KPC</sub>-containing isolates (n=20) were mapped against the longest of these (pKPC-f91, 47,290bp, NZ\_CP008826), and the alignments were examined for evidence of plasmid closure (e.g. coverage breaks and terminal read splits). Dark blue is coverage > 25 and light blue is coverage < 25.

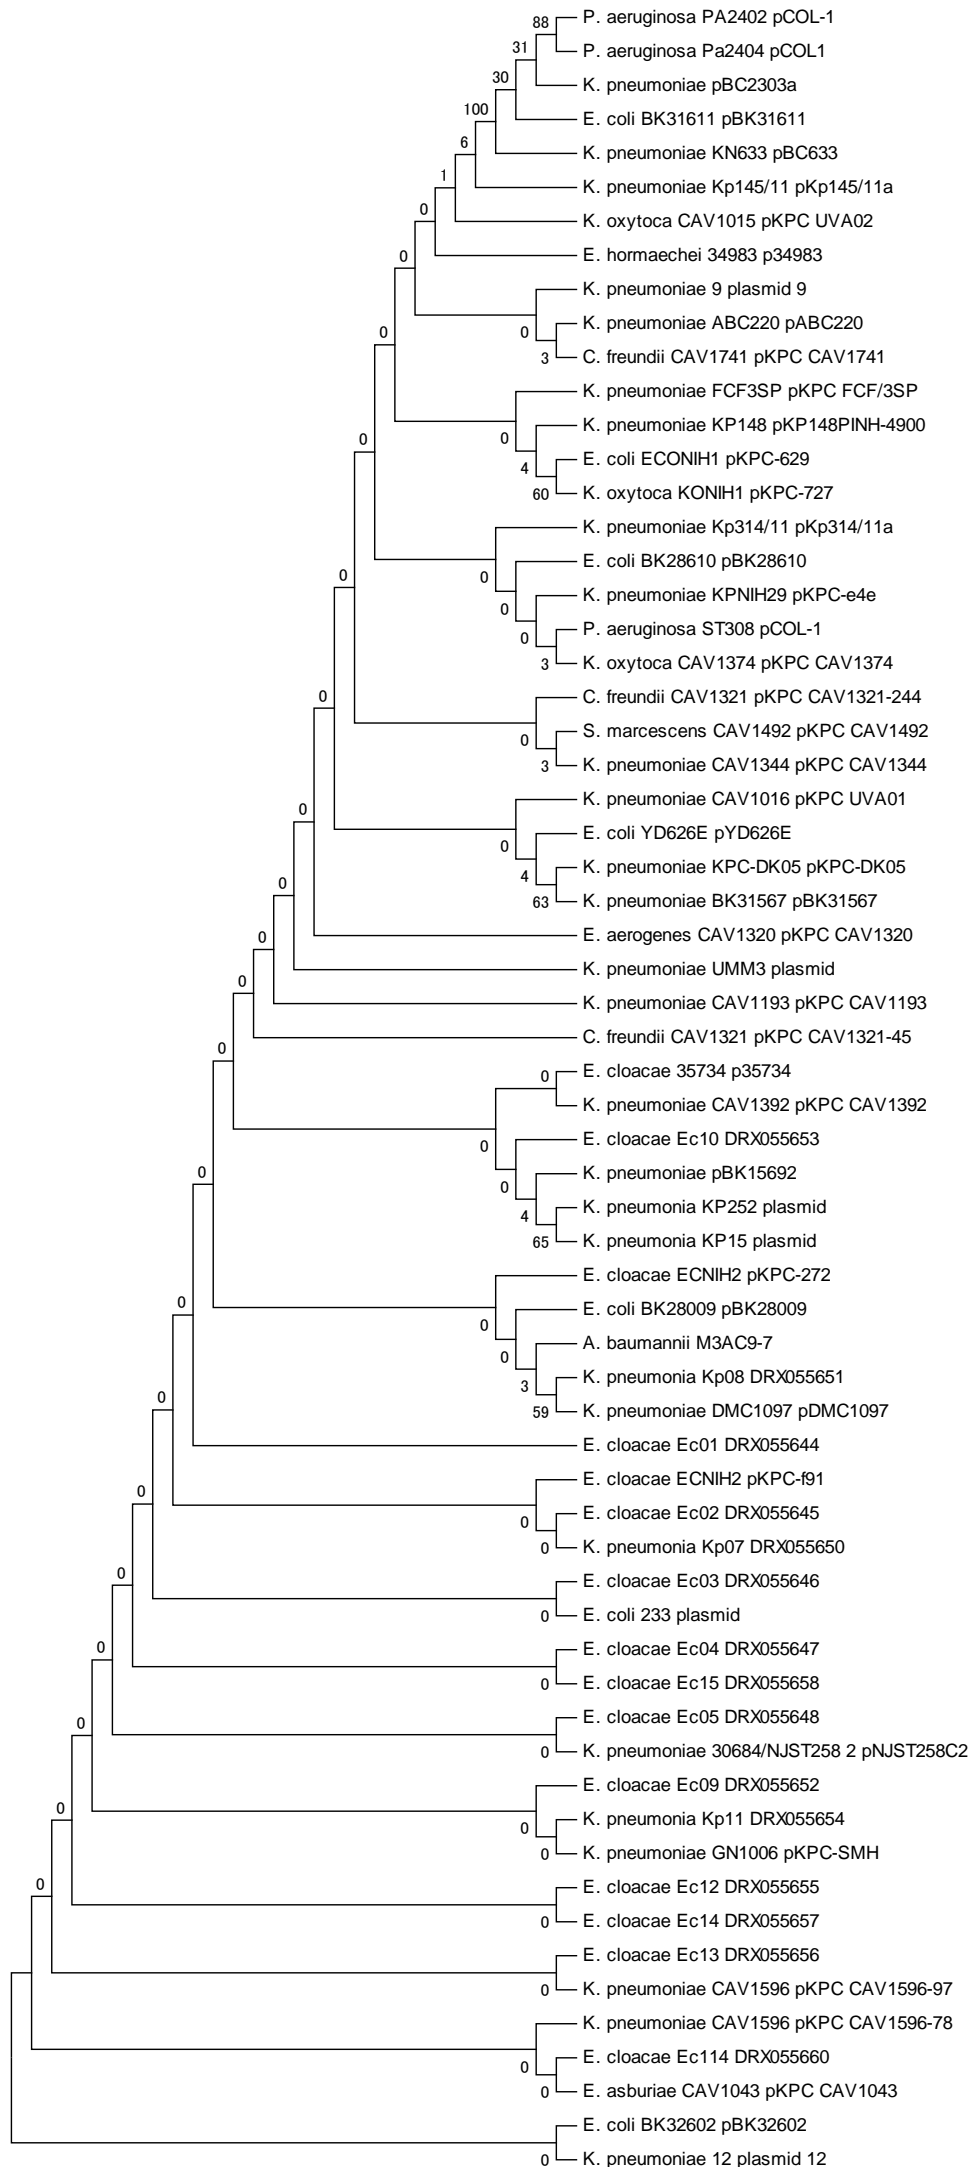

**Figure S3.** Tn4401b from the UNC outbreak cluster together when compared to Tn4401b elements from globally sourced samples. This phylogeny was inferred using the maximum-likelihood framework and the Tamura-Nei model. Maximum likelihood phylogeny of Tn4401b *de novo* assembled sequences from the UNC CRE outbreak were compared to all available Tn4401b sequences from GenBank. Branch confidence was confirmed using 500 bootstrap iterations. Evolutionary analyses were conducted in MEGA7 (<http://www.megasoftware.net/>).
